1                   **Characterisation of an inflammation-related epigenetic score and its**  
2                                           **association with cognitive ability**

3 Anna J. Stevenson<sup>1,2,3</sup>, Daniel L. McCartney<sup>1</sup>, Robert F. Hillary<sup>1</sup>, Archie Campbell<sup>1</sup>, Stewart W. Morris<sup>1</sup>,  
4 Mairead L. Bermingham<sup>1</sup>, Rosie M. Walker<sup>1,7</sup>, Kathryn L. Evans<sup>1,7</sup>, Thibaud S. Boutin<sup>4</sup>, Caroline  
5 Hayward<sup>4</sup>, Allan F. McRae<sup>5</sup>, Barry W. McColl<sup>2,3</sup>, Tara L. Spires-Jones<sup>2,3</sup>, Andrew M. McIntosh<sup>1,6</sup>, Ian J.  
6 Deary<sup>7,8</sup>, Riccardo E. Marioni<sup>1,7</sup>

7

- 8                   <sup>1.</sup> Centre for Genomic and Experimental Medicine, Institute of Genetics and Molecular Medicine,  
9                   University of Edinburgh, Edinburgh EH4 2XU, UK.  
10                  <sup>2.</sup> UK Dementia Research Institute, Edinburgh Medical School, University of Edinburgh, Edinburgh, UK  
11                  <sup>3.</sup> Centre for Discovery Brain Sciences, University of Edinburgh, Edinburgh, UK.  
12                  <sup>4.</sup> Medical Research Council Human Genetics Unit, Institute of Genetics and Molecular Medicine,  
13                  University of Edinburgh, Western General Hospital, Edinburgh EH4 2XU.  
14                  <sup>5.</sup> Institute for Molecular Bioscience, University of Queensland, Brisbane, QLD, Australia.  
15                  <sup>6.</sup> Division of Psychiatry, University of Edinburgh, Royal Edinburgh Hospital, Edinburgh, EH10 5HF, UK  
16                  <sup>7.</sup> Lothian Birth Cohorts, University of Edinburgh, Edinburgh EH8 9JZ, UK.  
17                  <sup>8.</sup> Department of Psychology, University of Edinburgh, Edinburgh EH8 9JZ, UK.

18

19

20

21

22

23

24

25

26

27

28

29

30

31

32

33

34

35

36 **ABSTRACT**

37 Results from large cohort studies investigating the association between inflammation and cognition  
38 have been mixed, possibly due to methodological disparities. However, a key issue in research  
39 utilising inflammatory biomarkers is their typically phasic responses. C-reactive protein (CRP) is  
40 widely used to investigate the association between chronic inflammation and cognition, but its  
41 plasma concentrations can markedly deviate in response to acute infection. Recently a large-scale  
42 epigenome-wide association study identified DNA methylation correlates of CRP. DNA methylation is  
43 thought to be relatively stable in the short term, marking it as a potentially useful signature of  
44 exposure. Here, we generate an epigenetic CRP score and investigate its trajectories with age, and  
45 associations with cognitive ability, in comparison to serum CRP in two cohorts: a longitudinal study  
46 of older adults (the Lothian Birth Cohort 1936, n=889) and a large, cross-sectional cohort  
47 (Generation Scotland, n=7,028).

48 We identified differing trajectories of serum CRP across the cohorts, with no homogeneous trends  
49 seen with age. Conversely, the epigenetic score was consistently found to increase with age, and to  
50 do so more rapidly in males compared to females. Higher levels of serum CRP were found to  
51 associate with poorer cognition in Lothian Birth Cohort 1936, but not in Generation Scotland.  
52 However, a consistent negative association was identified between cognition and the epigenetic  
53 score in both cohorts. Furthermore, the epigenetic score accounted for a greater proportion of  
54 variance in cognitive ability.

55 Our results suggest that epigenetic signatures of acute inflammatory markers may provide an  
56 enhanced signature of chronic inflammation, allowing for more reliable stratification of individuals,  
57 and thus clearer inference of associations with incident health outcomes.

58

59

60

61

62

63

64

65

66

67

## 68 1. INTRODUCTION

69 Cognitive impairment in older age is associated with an increased risk of morbidity and mortality,  
70 and a lower quality of life (1-3). Given the generally ageing population, and the significant personal  
71 and public health burden of age-related cognitive decline, insight into its determinants and the  
72 factors contributing to individual differences is critical. The strongest known risk factor for cognitive  
73 decline is older age, suggesting a unique facet of the ageing process is likely implicated.

74 Epidemiological studies have associated ageing with a progressive shift to a chronic inflammatory  
75 state. This low-grade, typically sub-acute, elevation of peripheral pro-inflammatory mediators in the  
76 absence of overt infection is strongly associated with the susceptibility to, and progression of, many  
77 age-associated diseases, and is a key risk factor for mortality (4-6). Accumulating evidence has also  
78 implicated chronic systemic inflammation with incident dementia, but the association with pre-  
79 morbid age-related cognitive decline is less firmly defined, and has generated considerable debate  
80 (7). Evidence from large, prospective cohort and cross-sectional studies has been largely mixed, with  
81 positive, negative and null associations identified between serum inflammatory biomarker levels and  
82 cognitive ability (8-12).

83 The conflicting findings evident in the inflammation-cognition literature may be attributed to  
84 methodological disparity between studies, including marked differences in both age of participants  
85 and type of cognitive assessment batteries used, hindering inter-study comparability. However, a  
86 key issue in research utilising inflammatory biomarkers is their typically phasic responses (4). C-  
87 reactive protein (CRP) – an acute-phase reactant of hepatic origin – is widely used in studies of  
88 inflammation. However, by definition, the plasma concentration of acute-phase proteins deviate by  
89 25% or more in inflammatory disorders (13). In particular, CRP is subject to swift and considerable  
90 shifts in response to injury or acute infection. Serum levels can rapidly increase up to 1,000-fold from  
91 baseline, typically resolving to basal concentrations over a period of 7-12 days (14, 15). This poses a  
92 potential issue when utilising CRP to investigate the association between inflammation and  
93 cognition: the biological variability of CRP may not be stable enough to enable reliable stratification  
94 using blood samples from individuals gathered at a single time point (16).

95 DNA methylation is a widely studied epigenetic mechanism involving the addition of methyl groups  
96 to the DNA molecule, typically at Cytosine-phosphate-Guanine (CpG) dinucleotides. These  
97 modifications are involved in the regulation of gene expression and are influenced by both genetics  
98 and the environment (17). Though DNA methylation is dynamic, the short-term variability in adults is  
99 thought to be relatively stable, marking it as a potentially useful signature of chronic exposure (18-  
100 20). Through epigenome-wide association studies (EWAS), DNA methylation signals at individual CpG

101 sites have been associated with various health and lifestyle factors, permitting the creation of  
102 methylation-based phenotypic predictors and signatures (21-24). Recently, a large-scale EWAS of  
103 serum CRP in adults identified potential DNA methylation correlates of chronic low-grade  
104 inflammation (25). Ligthart *et al.* identified differential methylation at 58 CpG sites that replicated  
105 across both a large European (n = 8,863) and African-American (n = 4,111) cohort. Using 7 CpG sites  
106 from this data, an inflammation-related epigenetic risk score was recently created and applied in a  
107 developmental framework investigating inflammation and child and adolescent mental health (26).

108 In the current study, we utilise this inflammation-related epigenetic score and characterise its  
109 relationship with serum CRP levels, its longitudinal dynamics and its association with cognitive ability  
110 in a longitudinal study of older adults (the Lothian Birth Cohort 1936) and a large, cross-sectional  
111 cohort (Generation Scotland: The Scottish Family Health Study).

## 112 **2. METHODS**

### 113 *2.1 Lothian Birth Cohort 1936 (LBC1936)*

114 The LBC1936 is a longitudinal study comprising individuals born in 1936, most of whom completed  
115 the Scottish Mental Survey 1947 – an intelligence test of 70,805 school children in Scotland -- aged  
116 around 11 years. Full details on the recruitment and assessment protocols of the study have been  
117 described previously (27, 28). Briefly, 1091 participants were recruited to the study aged around  
118 70 years. To date, up to three further waves of testing in older age have been completed at  
119 intervals of around 3 years at mean ages of 73, 76 and 79. At each wave data has been collected on a  
120 wealth of health outcomes, lifestyle factors, cognition, and biological measures.

#### 121 *2.1.1 DNA methylation preparation in LBC1936*

122 Detailed information on the DNA methylation profiling of LBC1936 has been reported previously (29,  
123 30). DNA methylation was measured at 485,512 CpG sites from whole-blood samples using the  
124 Illumina Human-Methylation450 BeadChip at the Edinburgh Clinical Research Facility. Quality control  
125 procedures were performed to remove low-quality samples (inadequate hybridisation, bisulfite  
126 conversion, nucleotide extension and staining signal) and probes with a low detection rate (<95% at  
127  $p < 0.01$ ) and low call rate (<450,000 probes detected at  $p < 0.01$ ). Samples where predicted and  
128 reported sex did not match, and probes on the sex chromosomes were additionally excluded.  
129 Methylation data were available for 895 individuals at Wave 1 of the LBC1936 study.

130

131

### 132 2.1.2 Cognitive data in LBC1936

133 A general fluid-type cognitive ability score ( $g_f$ ) was derived for each participant from the first un-  
134 rotated principal component of a principal components analysis on six of the Wechsler Adult  
135 Intelligence Scale-III tests measured at Wave 2 (~73 years). These tests assessed four different  
136 cognitive domains: letter-number sequencing and digit span backwards (working memory), digit-  
137 symbol coding and symbol search (processing speed), matrix reasoning (non-verbal reasoning) and  
138 block design (constructional ability) (31). This component explained 53% of the variance across the 6  
139 tests, with individual test loadings ranging from 0.66 to 0.78. Full details on the testing protocol for  
140 the cognitive tests in LBC1936 has been reported previously (27, 32).

### 141 2.1.3 C-reactive protein in LBC1936

142 Serum CRP was measured from venesected whole-blood samples. Levels were quantified using both  
143 a low-sensitivity assay (lsCRP; mg/L) at all four waves of data collection, and a high-sensitivity assay  
144 (hsCRP; mg/L) at waves 2 and 3 only. The low-sensitivity assay was performed using a dry-slide  
145 immuno-rate method on an OrthoFusion 5.1<sup>®</sup>FS analyser (Ortho Clinical Diagnostics). This assay  
146 cannot distinguish values less than 3<sup>®</sup>mg/L, thus all readings of <3<sup>®</sup>mg/L were assigned a value of  
147 1.5<sup>®</sup>mg/L. The high-sensitivity assay was performed at the University of Glasgow using an enzyme-  
148 linked immunosorbent assay (R&D Systems, Oxford, UK) (33).

### 149 2.1.4 Genotyping in LBC1936

150 DNA samples were genotyped at the Edinburgh Clinical Research Facility using the Illumina 610  
151 Quadv1 array. Preparation and quality control steps have been reported previously (34). Individuals  
152 were excluded on the basis of unresolved sex discrepancies, relatedness, and evidence of non-  
153 Caucasian descent. SNPs were included if they had a call rate  $\geq 0.98$ , minor allele frequency  $\geq 0.01$ ,  
154 and Hardy-Weinberg equilibrium test with  $P \geq 0.001$ .

### 155 2.2 Generation Scotland: The Scottish Family Health Study (GS)

156 GS is a family-based genetic epidemiology cohort sampled from the general population across three  
157 regions of Scotland. The recruitment protocol and cohort characteristics are described in detail  
158 elsewhere (35, 36). Initially, 7,953 individuals aged between 18 and 65 years were recruited between  
159 2006 and 2011 from General Practitioner registries. Family members of these subjects aged between  
160 18 and 99 years were then approached to participate. The final cohort comprised around 24,000  
161 subjects (59% female). Data were collected on various cognitive, psychiatric and health measures  
162 and DNA samples were collected for genotyping and methylation profiling.

163 *2.2.1 DNA methylation preparation in GS*

164 Genome-wide DNA methylation was profiled in samples derived from blood collected between 2006  
165 and 2011 using the Illumina Human-MethylationEPIC BeadChip. The methylation arrays were run in  
166 two separate sets. The present study includes analysis on methylation data from 2,578 unrelated  
167 individuals in the first set (referred to herein as set 1) and 4,450 unrelated individuals in the second  
168 set (set 2). Quality control steps for both sets have been fully reported previously (37). Briefly,  
169 ShinyMethyl was used to plot the logmedian intensity of methylated versus un-methylated signal  
170 per array and outliers were excluded upon visual inspection (38). Samples in which 1% of CpGs had a  
171 detection p-value in excess of 0.05, probes with a bead count of <3 in more than 5 samples, probes  
172 in which 5% of samples had a detection p-value of >0.05, and those where predicted and recorded  
173 sex diverged were also removed.

174 *2.2.2 Cognitive data in GS*

175 Similarly to LBC1936,  $g_f$  was obtained for each participant from the first un-rotated principal  
176 component of a principal components analysis of three tests of cognitive ability: logical memory,  
177 verbal fluency (executive function) and digit-symbol coding (processing speed). This  
178 component explained 49% of the variance across the three tests in set 1 and 50% in set 2. Individual  
179 test loadings in set 1 ranged from 0.61 to 0.78 and in set 2 from 0.64 to 0.77. Logical memory was  
180 assessed using the Wechsler Memory Scale III (39). Verbal fluency and digit symbol-coding were  
181 tested using the Wechsler Adult Intelligence Scale III (31). Additional information regarding the  
182 cognitive variables in GS has been described previously (40, 41).

183 *2.2.3 C-reactive protein in GS*

184 CRP was quantified at the University of Glasgow using a commercial high-sensitivity assay on an  
185 automated analyser (c311, Roche Diagnostics, UK). Manufacturer's calibration and quality control  
186 were employed. CRP data were available for 153 participants in Set 1 and 266 participants in Set 2.  
187 These samples had been selected as father/offspring pairs in a telomere length study.

188 *2.2.4 Genotyping in GS*

189 Genotyping was carried out using the Illumina HumanOmniExpressExome-8 v1.0 DNA Analysis  
190 BeadChip at the Wellcome Trust Clinical Research Facility (42). The arrays were imaged on an  
191 Illumina HiScan platform and genotypes were called automatically using GenomeStudio Analysis  
192 software v2011.1. SNPs with a minor allele frequency  $\leq 0.01$  and Hardy-Weinberg equilibrium test  
193 with  $P < 1 \times 10^{-6}$  were excluded.

### 194 2.3 Inflammation-related poly-epigenetic score

195 An inflammation-related poly-epigenetic score (i-PEGS) was derived for each participant as described  
196 by Barker *et al.* (26). Briefly, methylation beta values were extracted for the 7 CpG sites shown to  
197 have the strongest evidence of a functional association with serum CRP levels. These values were  
198 multiplied by their respective regression weights (corresponding to change in DNA methylation beta  
199 values per 1 unit increase in natural log-transformed CRP) taken from the largest EWAS of CRP to-  
200 date and summed to generate a single i-PEGS for each participant in each cohort (see  
201 **Supplementary Table 1** (25)). All of the regression weights from the EWAS were negative, resulting  
202 in a higher i-PEGS (ie. closer to zero) corresponding to a prediction of increased CRP levels. Of the 7  
203 CpG sites included in the original measure, one was unavailable in the GS data (cg06126421). This  
204 CpG site was thus also excluded in the LBC1936 data and an i-PEGS inclusive of the remaining 6 CpG  
205 sites was utilised in analyses for both cohorts to allow for comparability of results. The correlation  
206 coefficient between the 7-CpG and 6-CpG scores in LBC1936 was 0.95.

207 It should be noted that LBC1936 contributed ~300 hsCRP samples to the EWAS of CRP from which  
208 the i-PEGS was derived (25). This may mean results from this cohort are overfitted; however the  
209 LBC1936 individuals represent a small subset of the discovery sample (n=8,863), and the probes  
210 were selected to be highly significant so it is unlikely this had a significant impact on results.

### 211 2.4 Genetic score for CRP

212 An additive weighted genetic score for CRP was constructed in both cohorts from the 18 single  
213 nucleotide polymorphisms (SNPs) that passed the genome-wide threshold ( $p < 5 \times 10^{-8}$ ) in the largest  
214 available GWAS of CRP to date (23). Weighted dosages were calculated by multiplying the dose of  
215 each risk allele by the effect estimate from the GWAS (see **Supplementary Table 2**). An imputation  
216 quality score of >0.8 was applied to the SNPs.

### 217 2.5 Statistical analysis

218 Pearson correlations were calculated between serum CRP, the i-PEGS and the CRP genetic score in  
219 each cohort. Inter-wave correlations and intraclass correlation coefficients were estimated for the i-  
220 PEGS and serum lsCRP over the four waves of follow-up in LBC1936 to assess the stability of the  
221 measures and their test-retest reliability.

222 Age- and sex-adjusted linear regression models were used to obtain the cross-sectional associations  
223 between  $g_f$  and serum CRP, i-PEGS and the CRP genetic score. In LBC1936 these were conducted at  
224 Wave 2 (age~73) of the study due to the availability of both hs- and lsCRP measures at this time-  
225 point. Incremental  $R^2$  estimates were calculated between the null model and the models inclusive of

226 the predictors. The  $R^2$  statistic represents the difference between the  $R^2$  of the null model ( $g_f \sim \text{age} +$   
227 sex) and the  $R^2$  of models with the addition of the predictors individually.

228 Linear mixed models were used to investigate the change in i-PEGS over the four waves available for  
229 lsCRP and 2 waves for hsCRP in LBC1936. Sex was included as a fixed effect and age (years) as the  
230 timescale. Participant ID was fitted as a random effect on the intercept. Baseline i-PEGS or serum  
231 CRP was then included as a fixed effect interaction with age to test the prediction of subsequent  
232 change in cognitive ability.

233 Numeric variables were scaled to have a mean of zero and a variance of 1. CRP data were log-  
234 transformed (natural log) prior to analyses due to positive skews in its distribution.

235 Statistical analysis was performed in R version 3.5.0 (43).

### 236 **3. RESULTS**

#### 237 *3.1 Cohort Information*

238 Descriptive statistics of all the variables used in analyses are presented in **Table 1**. LBC1936 is an  
239 older cohort than GS (LBC1936 Wave 2: mean = 72.5 years; GS set 1: mean = 50 years; GS set 2:  
240 mean = 51.4 years), with a more even balance between sexes (LBC1936: 48% female; GS set 1: 61%  
241 female; GS set 2: 56% female). LBC1936 had the highest mean hsCRP and i-PEGS (mean hsCRP =  
242 2.93ng/mL, mean i-PEGS = -0.015) compared to both GS set 1 (mean CRP = 2.89ng/mL, mean i-PEGS  
243 = -0.012) and set 2 (mean CRP = 2.51ng/mL, mean i-PEGS = -0.013). The mean genetic score for CRP  
244 was 2.16 in both LBC1936 and GS set 1, and 2.15 in GS set 2.

#### 245 *3.2 Correlation between serum CRP, i-PEGS and genetic score.*

246 Correlations between serum CRP, i-PEGS and the genetic score are presented in **Figure 1**. In LBC1936  
247 and GS set 1, the correlations between the i-PEGS and serum CRP were modest (LBC1936: lsCRP:  $r =$   
248 0.25, 95% CI [0.22, 0.29]; hsCRP:  $r = 0.27$ , 95% CI [0.22, 0.32]; GS set 1:  $r = 0.12$ , 95% CI [0.04, 0.28]). A  
249 stronger correlation was evident in GS set 2 ( $r = 0.39$ , 95% CI [0.28, 0.49]). In LBC1936 the correlation  
250 between the genetic score for CRP and serum lsCRP was 0.17 (95% CI [0.13, 0.21]). For both hsCRP in  
251 LBC1936 and GS set 2 the correlation with the genetic score was 0.26 (LBC1936: 95% CI [0.21, 0.31],  
252 GS set 2: 95% CI [0.14, 0.36]). A stronger correlation was seen in set 1 ( $r = 0.35$ , 95% CI [0.2, 0.48]).  
253 The disparity in the correlations between cohorts may be due to there being relatively few  
254 individuals with both CRP and methylation data available in the GS cohort (set 1:  $n=153$ ; set 2:  
255  $n=266$ ) and a large imbalance between males and females within these subsets (set 1: 33.9% female;  
256 set 2: 9.7% female). Additionally, there was a relatively large age difference between cohorts



257 (LBC1936 Wave 2 mean = 72.5 years; GS set 1 mean = 46.6 years; GS set 2 mean = 55.5 years) which  
258 may have influenced results. The correlation between the i-PEGS and the genetic score was low in  
259 LBC1936 ( $r = 0.04$ , 95% CI [0.005, 0.08]) and slightly negative in GS (set 1:  $r = -0.03$ , 95% CI [-0.07,  
260 0.008]; set 2:  $r = -0.005$ , 95% CI [-0.03, 0.024]).

### 261 *3.3 Trajectories, and pseudo-trajectories, of i-PEGS and serum CRP*

262 Plots of the trajectories (pseudo-trajectories in GS) of both serum log(CRP) and i-PEGS in both  
263 cohorts are shown in **Figures 2A** and **2B**. The LBC1936 serum CRP trajectories have been plotted in a  
264 previous publication (44).

265 The trajectories of serum CRP in LBC1936 have been reported previously (44). log(lsCRP) was found  
266 to decline over the 9 years of follow ( $\beta = -0.014$ , SE = 0.005,  $p = 0.004$ ). log(hsCRP) levels measured  
267 over two waves did not significantly change ( $\beta = 0.004$ , SE = 0.01,  $p = 0.718$ ). Conversely, the i-PEGS  
268 was found to increase over the 9 years of follow-up by an average of 0.07 SD per year (SE=0.004,  
269  $p < 2 \times 10^{-16}$ ). A significant interaction was identified between age and sex, indicating that the i-PEGS  
270 inclined faster over time in males compared to females ( $\beta = 0.021$ , SE = 0.007,  $p = 0.004$ ).

271 The intraclass correlation coefficient for lsCRP over the four waves of follow-up in LBC1936 was 0.72  
272 (95% CI [0.69, 0.74],  $p < 2 \times 10^{-16}$ ). For the i-PEGS this was 0.82 (95% CI [0.75, 0.86],  $p < 2 \times 10^{-16}$ ), ranging  
273 from 0.60 (cg27023597) to 0.91 (cg18181703) in the 6 CpG sites that comprised the score. The  
274 correlations of the i-PEGS and serum CRP between the four waves in LBC1936 are presented in  
275 **Figure 3**. The inter-wave correlations of serum log(lsCRP) ranged from 0.35 (Wave 2-Wave 3) to 0.45  
276 (Wave 1-Wave 2). The correlations of the i-PEGS between waves were stronger, ranging from 0.52  
277 (Wave 1-Wave 2) to 0.71 (Wave 2-Wave 3).

278 In GS set 1, log(CRP) significantly increased with age ( $\beta = 0.021$ , SE = 0.007,  $p = 0.002$ ) whereas in set  
279 2 no significant change was identified ( $\beta = 0.006$ , SE = 0.005,  $p = 0.258$ ). In both sets, the i-PEGS  
280 increased with age with similar effect sizes ( $\beta = 0.017$ , SE = 0.001,  $p < 2 \times 10^{-16}$ , in both). Again, a  
281 significant interaction between age and sex was identified, with the i-PEGS increasing more rapidly in  
282 males (set 1:  $\beta = 0.015$ , SE = 0.003; set 2:  $\beta = 0.02$ , SE = 0.003, both  $p = 1.4 \times 10^{-6}$ )

### 283 *3.4 Cross-sectional associations with cognitive function*

284 The associations between the individual predictors – serum CRP, i-PEGS and the genetic score – and  
285  $g_f$  are presented in **Table 2**. lsCRP has previously been found to associate with cognitive ability cross-  
286 sectionally at Wave 1 of LBC1936 (45). We found that higher CRP (both high- and low-sensitivity) was  
287 associated with lower  $g_f$  in LBC1936 at Wave 2 (log(lsCRP):  $\beta = -0.12$ , SE = 0.03,  $p = 6.0 \times 10^{-4}$ ; log(hsCRP):  
288  $\beta = -0.13$ , SE = 0.04,  $p = 3.0 \times 10^{-4}$ ). There was no association between  $g_f$  and the genetic score ( $\beta = 0.005$ ,

289 SE=0.04,  $p=0.89$ ). The i-PEGS was found to be negatively associated with  $g_f$  ( $\beta= -0.14$ , SE=0.04,  
290  $p=8.5 \times 10^{-5}$ ).

291 In LBC1936 the  $R^2$  for the null model (age and sex as the only independent variables) was 0.21. The  
292 difference between  $R^2$  statistics of the null model and both CRP models was similar (lsCRP: 0.013;  
293 hsCRP: 0.012). The i-PEGS explained the greatest proportion of variance with an incremental  $R^2$  of  
294 0.021. An additive model inclusive of both serum CRP and the i-PEGS resulted in an incremental  $R^2$   
295 0.022.

296 In both GS sets, no association was identified between  $g_f$  and either serum CRP, or the genetic score  
297 (**Table 2**, all  $p \geq 0.188$ ); however, higher  $g_f$  was significantly associated with a lower i-PEGS in both  
298 sets (set 1:  $\beta= -0.05$ , SE=0.02,  $p=4.0 \times 10^{-4}$ ; set 2:  $\beta= -0.08$ , SE=0.01,  $p=1.9 \times 10^{-8}$ ).

### 299 *3.5 Longitudinal associations with cognitive function*

300 The longitudinal associations between baseline serum CRP and i-PEGS and  $g_f$  in LBC1936 are  
301 presented in **Supplementary Table 3**. There was no evidence to suggest either lsCRP or i-PEGS at  
302 Wave 1 of LBC1936 was predictive of subsequent change in  $g_f$  over the four years of follow-up  
303 (lsCRP:  $p = 0.687$ ; i-PEGS:  $p = 0.325$ ).

## 304 **4. DISCUSSION**

305 In the present study we identified discrepant trajectories of serum CRP across the cohorts, with no  
306 homogenous trends seen with age. Conversely, a DNA methylation-based CRP score – i-PEGS – was  
307 invariably found to increase with age, and to do so more rapidly in males than in females. While we  
308 found that raised levels of serum CRP associated with poorer cognitive ability cross-sectionally, a  
309 more consistent association was identified between the latter and the i-PEGS. However, neither  
310 baseline serum CRP nor the i-PEGS were associated with longitudinal change in cognitive ability.

311 Research into the complex relationship between systemic inflammation and cognitive ability relies  
312 upon accurate characterisation of inflammatory mediators to enable reliable conclusions. The  
313 generally acute nature of inflammatory biomarkers - including serum CRP – mean they are  
314 particularly valuable as clinical markers for close monitoring of disease activity when repeat  
315 measures may be taken in the period of hours or days. However, in epidemiological research,  
316 analysis is typically conducted on a single blood test that may provide an imprecise picture of the  
317 true chronicity of inflammation.

318 While ageing is considered to be linked to systemically raised inflammation (4), we identified  
319 divergent dynamics of serum CRP in both the longitudinal (LBC1936) and cross-sectional (GS)

320 cohorts, with increases, decreases and stable trajectories seen as a function of age. These  
321 inconsistencies highlight the challenges of utilising CRP as a biomarker of systemic inflammation in  
322 studies where it is quantified only once, or even at multiple time-points with large sampling intervals  
323 across the life-course of a longitudinal study. In contrast to serum CRP, we identified congruous  
324 increases in the i-PEGS in relation to age in both cohorts. In LBC1936, the increase per year, was  
325 greater than that seen in either GS set, potentially due to the cohort including only older individuals  
326 who may be more likely to experience a progressive elevation in inflammation (4, 46). Furthermore,  
327 we consistently found a significant interaction between i-PEGS and sex, with males having a steeper  
328 incline compared to females. This is conceivably due to men having a lower life-expectancy, and thus  
329 accelerated immune dysregulation, identified by the epigenetic score. The coherence of these  
330 results indicates the i-PEGS may be overcoming the measurement error of serum CRP, and perhaps  
331 providing a more reliable signature of chronic inflammation compared to the phenotype itself. This  
332 theory is bolstered by the higher correlations and test-retest coefficients of the i-PEGS, relative to  
333 serum CRP, between waves in LBC1936, indicating its enhanced stability over time. While the  
334 correlations between the i-PEGS and serum CRP were moderate, this may be because the single CRP  
335 measurement is not reflective of the chronic inflammatory state. As DNA methylation is considered  
336 relatively stable, the i-PEGS could conceivably be regarded as a cumulative, composite measure of  
337 inflammation akin to the HbA1c test typically utilised in diabetic patients to obtain a ~3 month  
338 average blood glucose recording (47). The i-PEGS may then have the potential to provide a more  
339 accurate biomarker of chronic inflammation that overcomes the noise that the phasic nature of  
340 serum CRP introduces, allowing for more reliable analyses of chronic inflammatory variance and its  
341 associative relationships.

342 We identified significant cross-sectional associations between serum CRP and  $g_f$  in LBC1936. Similar  
343 associations were not seen in GS, though we may have been underpowered to detect this as  
344 relatively few participants in this cohort had CRP data available. The association between  $g_f$  and the  
345 i-PEGS in LBC136 was more marked than that seen with serum CRP and similar results were found in  
346 GS. Furthermore, the i-PEGS augmented the explained variance in  $g_f$  beyond that accounted for by  
347 serum CRP, suggesting that while the two variables are somewhat collinear, the i-PEGS harbours  
348 independent information over the raw CRP measure. Additionally, while we omitted one CpG from  
349 our analyses to allow for comparisons across cohorts, sensitivity analysis in LBC1936 using the i-PEGS  
350 inclusive of all 7 CpGs resulted in a more pronounced association with  $g_f$  than the 6 CpG score,  
351 suggesting these results may be conservative. No associations were found between  $g_f$  and the  
352 genetic score, marking the epigenetic score as having the most powerful association with cognitive  
353 ability. Our results are consistent with a recent study identifying a negative association between i-

354 PEGS at birth, and cognitive function in early life (26). This, coupled with our results from GS, whose  
355 participant ages span early-adulthood to later-life, suggests inflammation and cognition may be  
356 related across the life-course rather than necessarily exclusively in older age. The larger effect size in  
357 LBC1936, however, suggest the association becomes more pronounced in older adults. Neither  
358 serum CRP nor the i-PEGS were associated with longitudinal change in cognitive ability over time  
359 indicating no predictive relationship between either measure of inflammation and cognitive decline.

360 Investigating the relationship between inflammation and cognition via the epigenetic score is  
361 particularly valuable. Firstly, it allows for research into the genomic regulation of pertinent loci,  
362 which may provide further insights into the pathways underlying the relationship, and marks them  
363 as potential therapeutic targets. Notable here is that the majority of the CpG sites included in the i-  
364 PEGS are in immune-related genes. Secondly, utilising a composite score that integrates information  
365 from multiple sites, rather than a single marker, is potentially more likely to provide a better  
366 estimate of inflammation. Finally, the epigenetic score may provide a proxy measure when CRP itself  
367 is not quantified, allowing for the investigation of inflammation in cohorts with only methylation  
368 data available.

369 The strengths of this study include the large sample sizes and the range of data available: GS is  
370 currently the largest epidemiological cohort studies with the availability of DNA methylation data  
371 and cognitive assessments, and LBC1936 is uniquely placed to investigate cognitive functioning, and  
372 its trajectories, in older age. The data also allowed us to investigate inflammation from a genetic,  
373 epigenetic, and phenotypic standpoint, permitting a comprehensive analysis of its relationship with  
374 cognition. However, both LBC1936 and GS are regarded as typically healthy cohorts and thus our  
375 findings may not extrapolate to the general population. It should also be noted that serum CRP is not  
376 directly produced by immune cells, and thus it is, in itself, a proxy marker of inflammation. While the  
377 i-PEGS may be capturing a more reliable picture of inflammation it would be desirable to investigate  
378 its relationship with a panel of inflammatory mediators, and to create epigenetic scores of other  
379 inflammatory mediators to test their comparative performance. Additionally, a chronic signature of  
380 inflammation might manifest in whole blood through changes in cell type proportions which should  
381 also be considered moving forward. Finally, no causal analysis was conducted in this study so it  
382 remains to be determined a) if CRP has a direct effect on methylation or indeed the opposite is true,  
383 though this has begun to be addressed elsewhere (25, 48); and b) if inflammation-related DNA  
384 methylation is causal of poorer cognition, vice-versa, or both are influenced by a confounding factor.

385

386

387 *Conclusion*

388 Here, we show that an inflammation-related poly-epigenetic score may provide a more stable index  
389 of chronic, low-grade inflammation in comparison to serum CRP itself. We found the epigenetic  
390 score associated more robustly with cognitive ability and explained a greater proportion of variance  
391 compared to the measured phenotype, demonstrating the potential value in using epigenetic  
392 information in place of labile phenotypes. Epigenetic signatures of acute inflammatory markers may  
393 provide a better signature of chronic inflammation, allowing for more reliable stratification of  
394 individuals, and thus clearer inference of associations with incident health outcomes.

395

396 **ACKNOWLEDGEMENTS**

397 The authors thank all individuals and project team members who have contributed to both GS and  
398 to the ‘STRADL: Stratifying Resilience and Depression Longitudinally’ follow-up study. GS received  
399 core support from the Chief Scientist Office of the Scottish Government Health Directorates  
400 (CZD/16/6) and the Scottish Funding Council (HR03006). Genotyping and DNA methylation profiling  
401 of the GS samples was carried out by the Genetics Core Laboratory at the Wellcome Trust Clinical  
402 Research Facility, Edinburgh, Scotland and was funded by the Medical Research Council UK and the  
403 Wellcome Trust (Wellcome Trust Strategic Award “STratifying Resilience and Depression  
404 Longitudinally” ((STRADL) Reference 104036/Z/14/Z)).

405 The authors thank all LBC1936 study participants and research team members who have  
406 contributed, and continue to contribute, to ongoing studies. LBC1936 is supported by Age UK  
407 (Disconnected Mind program) and the Medical Research Council (MR/M01311/1). Methylation  
408 typing was supported by Centre for Cognitive Ageing and Cognitive Epidemiology (Pilot Fund award),  
409 Age UK, The Wellcome Trust Institutional Strategic Support Fund, The University of Edinburgh, and  
410 The University of Queensland. We thank Professor Naomi Wray and Professor Peter Visscher for  
411 their useful input on the manuscript.

412 This work was in part conducted in the Centre for Cognitive Ageing and Cognitive Epidemiology,  
413 which is supported by the Medical Research Council and Biotechnology and Biological Sciences  
414 Research Council (MR/K026992/1) and which supports IJD. AJS and RFH are supported by funding  
415 from the Wellcome Trust 4-year PhD in Translational Neuroscience—training the next generation of  
416 basic neuroscientists to embrace clinical research [108890/Z/15/Z]. REM and DLM<sub>c</sub>C are supported  
417 by Alzheimer’s Research UK major project grant ARUK-PG2017B-10. TSJ and BWM are supported by  
418 the UK Dementia Research Institute which receives its funding from DRI Ltd, funded by the UK

419 Medical Research Council, Alzheimer's Society, and Alzheimer's Research UK. TSJ is additionally  
420 supported by the European Research Council (ERC) under the European Union's Horizon 2020  
421 research and innovation programme under grant agreement No 681181.

422

423

424

425

426

427

428

429

430

431

432

433

434

435

436

437

438

439

440

441

442

443

444

445

446

447

448

449

## 450 REFERENCES

- 451 1. Batty GD, Deary IJ, Zaninotto P. Association of Cognitive Function With Cause-Specific  
452 Mortality in Middle and Older Age: Follow-up of Participants in the English Longitudinal Study of  
453 Ageing. *American journal of epidemiology*. 2016;183(3):183-90.
- 454 2. Singh-Manoux A, Sabia S, Kivimaki M, Shipley MJ, Ferrie JE, Marmot MG. Cognition and  
455 incident coronary heart disease in late midlife: The Whitehall II study. *Intelligence*. 2009;37(6):529-  
456 34.
- 457 3. Deary IJ, Corley J, Gow AJ, Harris SE, Houlihan LM, Marioni RE, et al. Age-associated cognitive  
458 decline. *British medical bulletin*. 2009;92:135-52.
- 459 4. Franceschi C, Campisi J. Chronic inflammation (inflammaging) and its potential contribution  
460 to age-associated diseases. *The journals of gerontology Series A, Biological sciences and medical  
461 sciences*. 2014;69 Suppl 1:S4-9.
- 462 5. Coussens LM, Werb Z. Inflammation and cancer. *Nature*. 2002;420(6917):860-7.
- 463 6. Bonaccio M, Di Castelnuovo A, Pounis G, De Curtis A, Costanzo S, Persichillo M, et al. A score  
464 of low-grade inflammation and risk of mortality: prospective findings from the Moli-sani study.  
465 *Haematologica*. 2016;101(11):1434-41.
- 466 7. Bettcher BM, Kramer JH. Longitudinal inflammation, cognitive decline, and Alzheimer's  
467 disease: a mini-review. *Clinical pharmacology and therapeutics*. 2014;96(4):464-9.
- 468 8. Engelhart MJ, Geerlings MI, Meijer J, Kiliaan A, Ruitenberg A, van Swieten JC, et al.  
469 Inflammatory proteins in plasma and the risk of dementia: the rotterdam study. *Archives of  
470 neurology*. 2004;61(5):668-72.
- 471 9. Koyama A, O'Brien J, Weuve J, Blacker D, Metti AL, Yaffe K. The role of peripheral  
472 inflammatory markers in dementia and Alzheimer's disease: a meta-analysis. *The journals of  
473 gerontology Series A, Biological sciences and medical sciences*. 2013;68(4):433-40.
- 474 10. Buchman AS, Bennett DA. High CRP with "normal" cognition: a resilient phenotype in old  
475 age. *Neurology*. 2012;79(11):1078-9.
- 476 11. Zheng F, Xie W. High-sensitivity C-reactive protein and cognitive decline: the English  
477 Longitudinal Study of Ageing. *Psychological medicine*. 2018;48(8):1381-9.
- 478 12. Walker KA, Gottesman RF, Wu A, Knopman DS, Gross AL, Mosley TH, Jr., et al. Systemic  
479 inflammation during midlife and cognitive change over 20 years: The ARIC Study. *Neurology*.  
480 2019;92(11):e1256-e67.
- 481 13. Morley JJ, Kushner I. Serum C-reactive protein levels in disease. *Annals of the New York  
482 Academy of Sciences*. 1982;389:406-18.
- 483 14. Gabay C, Kushner I. Acute-phase proteins and other systemic responses to inflammation.  
484 *The New England journal of medicine*. 1999;340(6):448-54.
- 485 15. Sproston NR, Ashworth JJ. Role of C-Reactive Protein at Sites of Inflammation and Infection.  
486 *Front Immunol*. 2018;9:754-.
- 487 16. Koenig W, Sund M, Frohlich M, Lowel H, Hutchinson WL, Pepys MB. Refinement of the  
488 association of serum C-reactive protein concentration and coronary heart disease risk by correction  
489 for within-subject variation over time: the MONICA Augsburg studies, 1984 and 1987. *American  
490 journal of epidemiology*. 2003;158(4):357-64.
- 491 17. Jaenisch R, Bird A. Epigenetic regulation of gene expression: how the genome integrates  
492 intrinsic and environmental signals. *Nature genetics*. 2003;33 Suppl:245-54.
- 493 18. Dolinoy DC, Weidman JR, Jirtle RL. Epigenetic gene regulation: linking early developmental  
494 environment to adult disease. *Reproductive toxicology (Elmsford, NY)*. 2007;23(3):297-307.
- 495 19. Byun HM, Nordio F, Coull BA, Tarantini L, Hou L, Bonzini M, et al. Temporal stability of  
496 epigenetic markers: sequence characteristics and predictors of short-term DNA methylation  
497 variations. *PLoS one*. 2012;7(6):e39220.
- 498 20. Talens RP, Boomsma DI, Tobi EW, Kremer D, Jukema JW, Willemsen G, et al. Variation,  
499 patterns, and temporal stability of DNA methylation: considerations for epigenetic epidemiology.  
500 *The FASEB Journal*. 2010;24(9):3135-44.

- 501 21. McCartney DL, Hillary RF, Stevenson AJ, Ritchie SJ, Walker RM, Zhang Q, et al. Epigenetic  
502 prediction of complex traits and death. *Genome biology*. 2018;19(1):136.
- 503 22. Hamilton OKL, Zhang Q, McRae AF, Walker RM, Morris SW, Redmond P, et al. An epigenetic  
504 score for BMI based on DNA methylation correlates with poor physical health and major disease in  
505 the Lothian Birth Cohort. *International Journal of Obesity*. 2019.
- 506 23. Sayols-Baixeras S, Subirana I, Lluís-Ganella C, Civeira F, Roquer J, Do AN, et al. Identification  
507 and validation of seven new loci showing differential DNA methylation related to serum lipid profile:  
508 an epigenome-wide approach. *The REGICOR study. Human molecular genetics*. 2016;25(20):4556-  
509 65.
- 510 24. Guay SP, Voisin G, Brisson D, Munger J, Lamarche B, Gaudet D, et al. Epigenome-wide  
511 analysis in familial hypercholesterolemia identified new loci associated with high-density lipoprotein  
512 cholesterol concentration. *Epigenomics*. 2012;4(6):623-39.
- 513 25. Ligthart S, Marzi C, Aslibekyan S, Mendelson MM, Conneely KN, Tanaka T, et al. DNA  
514 methylation signatures of chronic low-grade inflammation are associated with complex diseases.  
515 *Genome biology*. 2016;17(1):255.
- 516 26. Barker ED, Cecil CAM, Walton E, Houtepen LC, O'Connor TG, Danese A, et al. Inflammation-  
517 related epigenetic risk and child and adolescent mental health: A prospective study from pregnancy  
518 to middle adolescence. *Development and psychopathology*. 2018;30(3):1145-56.
- 519 27. Deary IJ, Gow AJ, Pattie A, Starr JM. Cohort profile: the Lothian Birth Cohorts of 1921 and  
520 1936. *International journal of epidemiology*. 2012;41(6):1576-84.
- 521 28. Taylor AM, Pattie A, Deary IJ. Cohort Profile Update: The Lothian Birth Cohorts of 1921 and  
522 1936. *International journal of epidemiology*. 2018;47(4):1042-r.
- 523 29. Marioni RE, Shah S, McRae AF, Chen BH, Colicino E, Harris SE, et al. DNA methylation age of  
524 blood predicts all-cause mortality in later life. *Genome biology*. 2015;16:25.
- 525 30. Shah S, McRae AF, Marioni RE, Harris SE, Gibson J, Henders AK, et al. Genetic and  
526 environmental exposures constrain epigenetic drift over the human life course. *Genome research*.  
527 2014;24(11):1725-33.
- 528 31. Wechsler D. *Wechsler Adult Intelligence Scale - Third Edition (WAIS-III)*. 1997.
- 529 32. Deary IJ, Gow AJ, Taylor MD, Corley J, Brett C, Wilson V, et al. The Lothian Birth Cohort 1936:  
530 a study to examine influences on cognitive ageing from age 11 to age 70 and beyond. *BMC geriatrics*.  
531 2007;7:28.
- 532 33. Aribisala BS, Wiseman S, Morris Z, Valdes-Hernandez MC, Royle NA, Maniega SM, et al.  
533 Circulating inflammatory markers are associated with magnetic resonance imaging-visible  
534 perivascular spaces but not directly with white matter hyperintensities. *Stroke*. 2014;45(2):605-7.
- 535 34. Davies G, Tenesa A, Payton A, Yang J, Harris SE, Liewald D, et al. Genome-wide association  
536 studies establish that human intelligence is highly heritable and polygenic. *Molecular psychiatry*.  
537 2011;16(10):996-1005.
- 538 35. Smith BH, Campbell H, Blackwood D, Connell J, Connor M, Deary IJ, et al. Generation  
539 Scotland: the Scottish Family Health Study; a new resource for researching genes and heritability.  
540 *BMC medical genetics*. 2006;7:74.
- 541 36. Smith BH, Campbell A, Linksted P, Fitzpatrick B, Jackson C, Kerr SM, et al. Cohort Profile:  
542 Generation Scotland: Scottish Family Health Study (GS:SFHS). The study, its participants and their  
543 potential for genetic research on health and illness. *International journal of epidemiology*.  
544 2013;42(3):689-700.
- 545 37. Madden RA, McCartney DL, Walker RM, Hillary RF, Bermingham ML, Rawlik K, et al. Birth  
546 weight predicts psychiatric and physical health, cognitive function, and DNA methylation differences  
547 in an adult population. *bioRxiv*. 2019:664045.
- 548 38. Fortin J-P, Fertig E, Hansen K. shinyMethyl: interactive quality control of Illumina 450k DNA  
549 methylation arrays in R. *F1000Res*. 2014;3:175-.
- 550 39. Wechsler D. *Wechsler Memory Scale - Third Edition*. 1997.



- 551 40. Marioni RE, Campbell A, Scotland G, Hayward C, Porteous DJ, Deary IJ. Differential effects of  
552 the APOE e4 allele on different domains of cognitive ability across the life-course. *European journal*  
553 *of human genetics* : EJHG. 2016;24(6):919-23.
- 554 41. Hagenaars SP, Harris SE, Clarke TK, Hall L, Luciano M, Fernandez-Pujals AM, et al. Polygenic  
555 risk for coronary artery disease is associated with cognitive ability in older adults. *International*  
556 *journal of epidemiology*. 2016.
- 557 42. Gunderson KL. Whole-genome genotyping on bead arrays. *Methods in molecular biology*  
558 (Clifton, NJ). 2009;529:197-213.
- 559 43. Revelle W. *psych: Procedures for Psychological, Psychometric, and Personality Research*,  
560 Northwestern University, Evanston, Illinois, USA, <https://CRAN.R-project.org/package=psych> Version  
561 = 1.8.12. 2018.
- 562 44. Stevenson AJ, McCartney DL, Harris SE, Taylor AM, Redmond P, Starr JM, et al. Trajectories  
563 of inflammatory biomarkers over the eighth decade and their associations with immune cell profiles  
564 and epigenetic ageing. *Clinical Epigenetics*. 2018;10(1):159.
- 565 45. Luciano M, Marioni RE, Gow AJ, Starr JM, Deary IJ. Reverse causation in the association  
566 between C-reactive protein and fibrinogen levels and cognitive abilities in an aging sample.  
567 *Psychosomatic medicine*. 2009;71(4):404-9.
- 568 46. Sanada F, Taniyama Y, Muratsu J, Otsu R, Shimizu H, Rakugi H, et al. Source of Chronic  
569 Inflammation in Aging. *Front Cardiovasc Med*. 2018;5:12-.
- 570 47. Gonen B, Rubenstein A, Rochman H, Tanega SP, Horwitz DL. Haemoglobin A1: An indicator of  
571 the metabolic control of diabetic patients. *Lancet (London, England)*. 1977;2(8041):734-7.
- 572 48. Walton E, Hemani G, Dehghan A, Relton C, Smith GD. Systematic evaluation of the causal  
573 relationship between DNA methylation and C-reactive protein. *bioRxiv*. 2018:397836.

574

575

576

577

578

579

580

581

582

583

584

585

586

587

588

589

590

591 **Table 1. Cohort characteristics.** LBC1936 summary statistics are from Wave 2 of the study.

592 LBC1936 = Lothian Birth Cohort 1936; GS = Generation Scotland; CRP = C-reactive protein; ls = low-  
 593 sensitivity, hs= high-sensitivity, i-PEGS = inflammation-related poly-epigenetic score;  $g_f$  = general  
 594 cognitive ability score.

595

|                       | <b>n</b> | <b>Mean</b> | <b>SD</b> |
|-----------------------|----------|-------------|-----------|
| <b>LBC1936</b>        | 801      | -           | -         |
| <i>Age (years)</i>    | -        | 72.5        | 0.7       |
| <i>Sex (% female)</i> | 47.6     | -           | -         |
| <i>hsCRP (ng/mL)</i>  | 815      | 2.93        | 5.4       |
| <i>lsCRP (mg/L)</i>   | 830      | 4.94        | 7.8       |
| <i>i-PEGS</i>         | 801      | -0.015      | 0.001     |
| $g_f$                 | 856      | 0.072       | 0.9       |
| <i>Genetic score</i>  | 1005     | 2.16        | 0.3       |
| <b>GS set 1</b>       |          |             |           |
|                       | 2578     | -           | -         |
| <i>Age (years)</i>    | -        | 50          | 12.5      |
| <i>Sex (% female)</i> | 61.4     | -           | -         |
| <i>hsCRP (ng/mL)</i>  | 153      | 2.89        | 6.4       |
| <i>i-PEGS</i>         | 2578     | -0.012      | <0.001    |
| $g_f$                 | 2537     | 0.006       | 0.9       |
| <i>Genetic score</i>  | 2578     | 2.16        | 0.3       |
| <b>GS set 2</b>       |          |             |           |
|                       | 4450     | -           | -         |
| <i>Age (years)</i>    | -        | 51.4        | 13.2      |
| <i>Sex (% female)</i> | 56.31    | -           | -         |
| <i>hsCRP (ng/mL)</i>  | 266      | 2.51        | 5.1       |
| <i>i-PEGS</i>         | 4450     | -0.013      | <0.001    |
| $g_f$                 | 4343     | 0.007       | 0.9       |
| <i>Genetic score</i>  | 4450     | 2.15        | 0.3       |

596

597

598

599

600

601

602

603

604

605 **Table 2.** Associations between  $g_f$  and individual predictors. LBC1936 = Lothian Birth Cohort 1936; GS  
606 = Generation Scotland; CRP = C-reactive protein; ls = low-sensitivity, hs= high-sensitivity, i-PEGS =  
607 inflammation-related poly-epigenetic score, SE = standard error.

608

|                      | Standardised $\beta$ | SE   | P                                      |
|----------------------|----------------------|------|----------------------------------------|
| <b>LBC1936</b>       |                      |      |                                        |
| <i>log(lsCRP)</i>    | -0.12                | 0.03 | <b>0.0006</b>                          |
| <i>log(hsCRP)</i>    | -0.13                | 0.04 | <b>0.0004</b>                          |
| <i>Genetic score</i> | 0.005                | 0.04 | 0.891                                  |
| <i>i-PEGS</i>        | -0.14                | 0.04 | <b><math>8.5 \times 10^{-5}</math></b> |
| <b>GS set 1</b>      |                      |      |                                        |
| <i>log(CRP)</i>      | -0.1                 | 0.08 | 0.188                                  |
| <i>Genetic score</i> | -0.02                | 0.07 | 0.756                                  |
| <i>i-PEGS</i>        | -0.05                | 0.02 | <b>0.0004</b>                          |
| <b>GS set 2</b>      |                      |      |                                        |
| <i>log(CRP)</i>      | -0.02                | 0.06 | 0.698                                  |
| <i>Genetic score</i> | 0.05                 | 0.05 | 0.313                                  |
| <i>i-PEGS</i>        | -0.08                | 0.01 | <b><math>1.9 \times 10^{-8}</math></b> |

609

610

611

612

613

614

615

616

617

618

619

620

621

622

623

624

625

626 **Figure 1.** Pearson correlations between serum CRP, i-PEGS and the genetic score in LBC1936 (n=801),  
 627 GS set 1 (n=153), and GS set 2 (n=266).

628 LBC1936 = Lothian Birth Cohort 1936; GS = Generation Scotland; CRP = C-reactive protein; ls = low-  
 629 sensitivity, hs= high-sensitivity, i-PEGS = inflammation-related poly-epigenetic score.

630

631

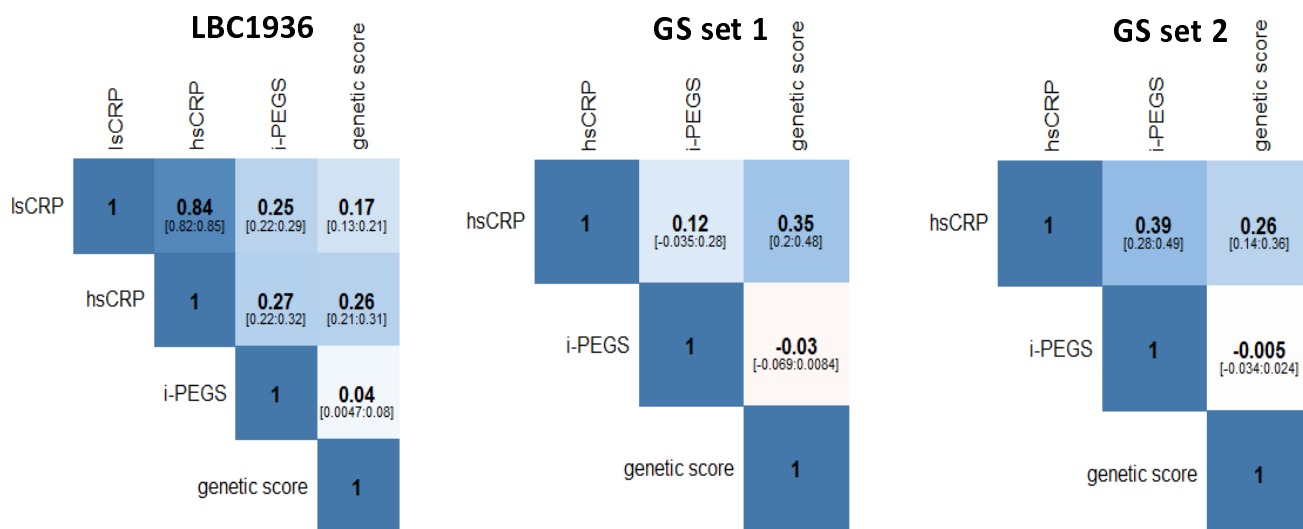

642

643

644

645

646

647

648

649

650

651

652

653

654

655

656

657

658 **Figure 2.** Trajectories or pseudo-trajectories of **(A)** serum CRP and **(B)** i-PEGS over age in LBC1936,  
659 GS set 1 and GS set 2. Regression lines are shown for males (purple) and females (blue).

660 LBC1936 = Lothian Birth Cohort 1936; GS = Generation Scotland; CRP = C-reactive protein; ls = low-  
661 sensitivity, hs= high-sensitivity, i-PEGS = inflammation-related poly-epigenetic score.

662 **A**

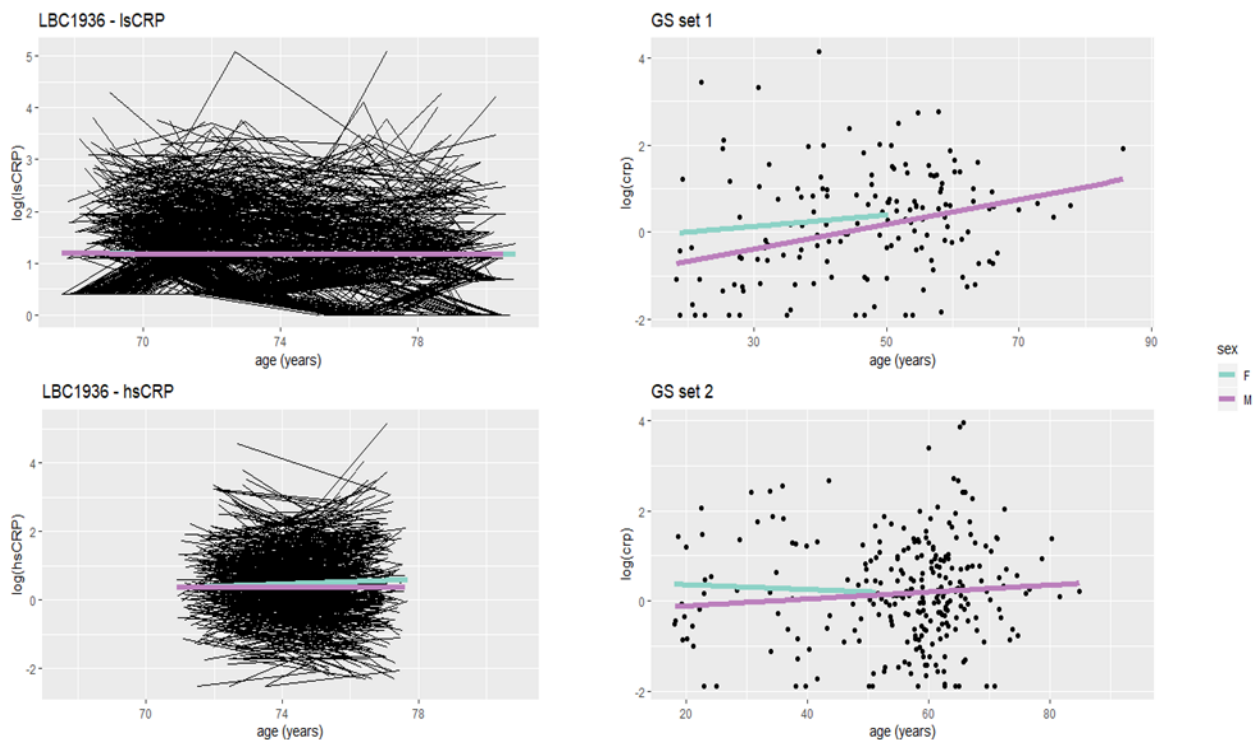

663

664 **B**

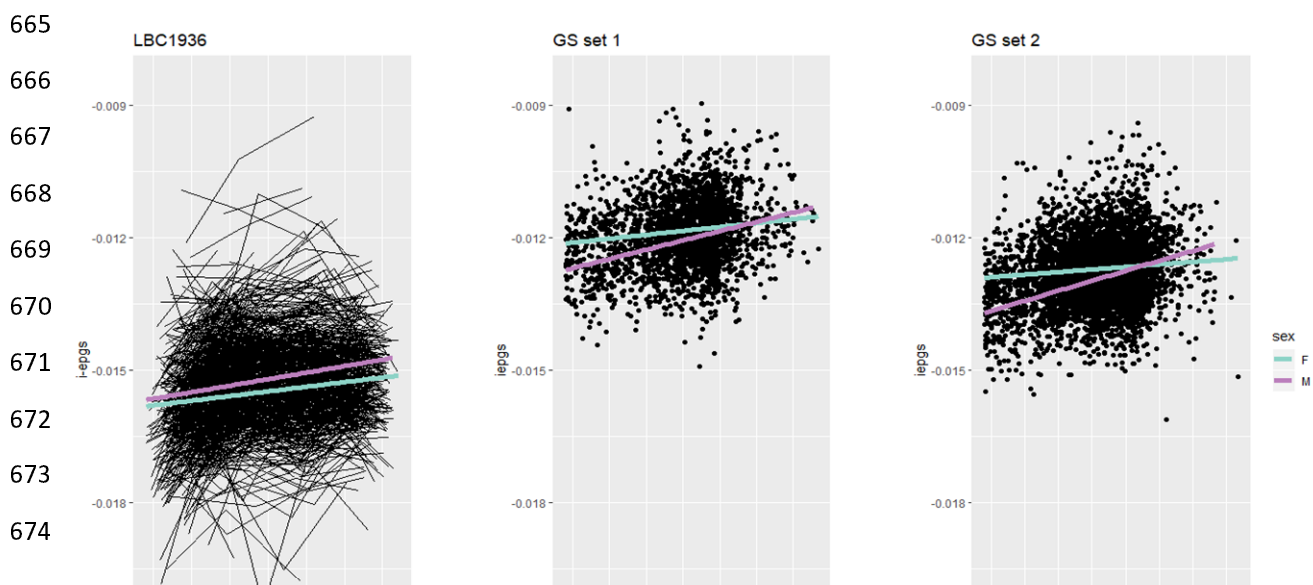

674

675 **Figure 3.** Inter-wave Pearson correlations of i-PEGS and serum CRP in LBC1936.

676 i-PEGS = inflammation-related poly-epigenetic score; CRP = c-reactive protein; W = wave.

677

678

679

680

681

682

683

684

685

686

687

688

689

690

691

692

693

694

695

696

697

698

699

700

701

702

703

704

705

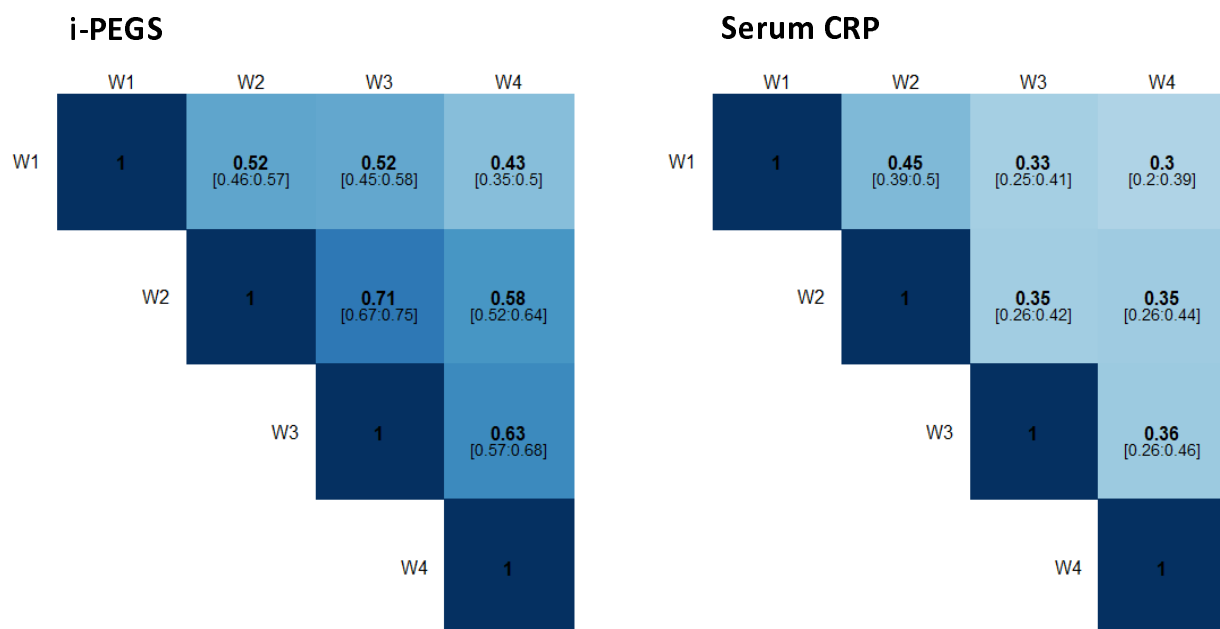

Source: http://biorxiv.org/content/10.1101/802009v1.full.pdf
